# Supplementary material for: Polo-like kinase 1 plays an oncogenic role in pan-cancer based on bioinformatics and biological assays
Source: Research Square preprint supplement (doi:10.21203/rs.3.rs-1418158/v1), 2022-03-22
Supplement: Supplementary file 1 [file 9baa14b8e56115a80b8318e4.xlsx]

## Sheet: Sheet1
Supplementary Table 1. Clinical data of glioma patients
Patient ID	Sample	WHO	Gender	Age	Pathology
2754803	HYH_6846	Ⅱ	male	30	Oligodendroglioma
3311481	LFY_6827	Ⅱ	male	42	Oligodendroglioma
3367008	LX_6820	Ⅱ	male	36	Oligodendroglioma
3371401	ZYG_6821	Ⅱ	male	38	Astrocytoma
3384440	CJY_6834	Ⅱ	female	28	Oligodendroglioma
3389489	SX_6836	Ⅱ	female	49	Oligodendroglioma
3475747	LXD_6851	Ⅱ	male	51	Astrocytoma
3479592	WWL_6959	Ⅱ	male	66	Astrocytoma
3481399	ZL_6847	Ⅱ	female	56	Astrocytoma
3495373	XJS_6858	Ⅱ	male	44	Astrocytoma
3496872	YZW_6862	Ⅱ	male	37	Oligodendroglioma
3499689	XBL_6965	Ⅱ	male	55	Oligodendroglioma
3504250	CYM_6868	Ⅱ	female	47	Oligodendroglioma
3508488	SGH_6871	Ⅱ	male	34	Astrocytoma
3521531	LLL_6875	Ⅱ	male	30	Oligodendroglioma
3528635	SQ_6894	Ⅱ	female	42	Oligodendroglioma
3535093	ZJH_6893	Ⅱ	female	36	Oligodendroglioma
3536208	HCL_6970	Ⅱ	male	49	Astrocytoma
3539182	CJ_6972	Ⅱ	male	33	Astrocytoma
3540860	WSX_6899	Ⅱ	female	50	Astrocytoma
3543020	YFQ_6902	Ⅱ	female	45	Astrocytoma
3574398	LFR_6976	Ⅱ	female	48	Astrocytoma
3581240	XHD_6923	Ⅱ	male	46	Astrocytoma
3582765	ZY_6922	Ⅱ	female	34	Astrocytoma
3585713	ZLS_6931	Ⅱ	male	49	Oligodendroglioma
3608868	LJH_6981	Ⅱ	female	54	Astrocytoma
3609857	ZXM_6937	Ⅱ	female	47	Oligodendroglioma
3628846	ZGS_6953	Ⅱ	male	42	Oligodendroglioma
3634430	ZAC_6951	Ⅱ	male	38	Oligodendroglioma
3639477	SWJ_6950	Ⅱ	male	25	Astrocytoma
3646361	LB_6952	Ⅱ	male	49	Oligodendroglioma
3647383	HZQ_6993	Ⅱ	male	25	Astrocytoma
3649372	SL_6995	Ⅱ	female	56	Oligodendroglioma
3350346	WLN_6814	Ⅲ	female	25	Oligodendroglioma
3358439	LML_6815	Ⅲ	male	55	Oligodendroglioma
3369277	RSY_6819	Ⅲ	male	53	Oligodendroglioma
3379869	LHM_6840	Ⅲ	male	31	Astrocytoma
3476949	SGHQ_6848	Ⅲ	male	57	Oligodendroglioma
3479633	LXH_6849	Ⅲ	male	35	Astrocytoma
3511752	FSP_6968	Ⅲ	female	40	Oligodendroglioma
3521018	WHW_6878	Ⅲ	female	67	Oligodendroglioma
3547308	ZSY_6908	Ⅲ	male	49	Oligodendroglioma
3588011	WYM_6929	Ⅲ	female	36	Oligodendroglioma
3600054	FZB_6930	Ⅲ	male	39	Glioblastoma
3629514	GCX_6986	Ⅲ	female	50	Glioblastoma
3643410	LQ_6994	Ⅲ	female	36	Glioblastoma
3652984	JWJ_6428	Ⅲ	female	33	Astrocytoma
3689193	LHP_6431	Ⅲ	female	45	Oligodendroglioma
3695655	LQY_6432	Ⅲ	female	48	Oligodendroglioma
3707789	YGW_6462	Ⅲ	male	53	Glioblastoma
1319772	WQQ_6832	Ⅳ	male	62	Astrocytoma
3279182	LBY_6860	Ⅳ	male	66	Glioblastoma
3313941	LDG_6824	Ⅳ	male	53	Glioblastoma
3323161	ZDH_6831	Ⅳ	female	55	Glioblastoma
3326132	ZCM_6829	Ⅳ	female	67	Glioblastoma
3379898	CYT_6822	Ⅳ	male	61	Glioblastoma
3383560	YXZ_6823	Ⅳ	male	59	Glioblastoma
3393117	LHZ_6837	Ⅳ	female	40	Glioblastoma
3459001	HSL_6841	Ⅳ	female	72	Glioblastoma
3469758	WMM_6843	Ⅳ	male	50	Glioblastoma
3484026	LL_6850	Ⅳ	female	62	Glioblastoma
3493640	WXH_6856	Ⅳ	female	58	Glioblastoma
3500408	KLY_6966	Ⅳ	male	63	Glioblastoma
3501025	LJG_6859	Ⅳ	male	49	Glioblastoma
3501277	ZQL_6864	Ⅳ	male	77	Glioblastoma
3508897	LHP_6867	Ⅳ	male	54	Glioblastoma
3510288	WGZ_6866	Ⅳ	female	49	Glioblastoma
3514071	WHY_6873	Ⅳ	female	63	Astrocytoma
3517143	MXC_6876	Ⅳ	male	44	Glioblastoma
3519576	FXM_6877	Ⅳ	female	74	Glioblastoma
3524987	ZCJ_6882	Ⅳ	female	71	Glioblastoma
3529389	WZD_6885	Ⅳ	male	59	Glioblastoma
3529536	HSL_6887	Ⅳ	male	46	Glioblastoma
3530724	WJ_6890	Ⅳ	male	60	Glioblastoma
3530886	QYL_6886	Ⅳ	female	28	Glioblastoma
3531323	ZCL_6891	Ⅳ	female	69	Glioblastoma
3531836	CGG_6889	Ⅳ	male	45	Glioblastoma
3533382	LJZ_6892	Ⅳ	male	46	Glioblastoma
3536424	ZXY_6973	Ⅳ	female	30	Glioblastoma
3537805	NZY_6896	Ⅳ	male	50	Glioblastoma
3541925	WML_6905	Ⅳ	female	51	Glioblastoma
3542962	LAR_6974	Ⅳ	female	64	Glioblastoma
3547298	CLL_6975	Ⅳ	female	26	Glioblastoma
3547784	XMN_6909	Ⅳ	female	45	Glioblastoma
3557371	GFS_6910	Ⅳ	male	74	Glioblastoma
3570532	MZX_6917	Ⅳ	male	50	Glioblastoma
3571709	HGX_6920	Ⅳ	male	51	Glioblastoma
3574537	LSN_6921	Ⅳ	female	56	Glioblastoma
3578065	CXY_6978	Ⅳ	female	72	Glioblastoma
3583139	ZGR_3625	Ⅳ	female	71	Astrocytoma
3584805	WZZ_6927	Ⅳ	female	18	Glioblastoma
3591713	WSY_6928	Ⅳ	female	30	Glioblastoma
3599871	QXZ_6980	Ⅳ	female	78	Glioblastoma
3602726	FXQ_6935	Ⅳ	male	48	Glioblastoma
3623436	QSY_6984	Ⅳ	female	19	Glioblastoma
3626519	CCX_6985	Ⅳ	male	78	Glioblastoma
3626914	PCY_6944	Ⅳ	male	58	Glioblastoma
3637878	CZR_6988	Ⅳ	female	64	Glioblastoma
3640564	ZCY_6996	Ⅳ	male	27	Glioblastoma
3650599	HMH_6956	Ⅳ	female	69	Glioblastoma
